# Supplementary material for: Tuning the electronic and photophysical properties of heteroleptic iridium(iii) phosphorescent emitters through ancillary ligand substitution: a theoretical perspective
Source: Royal Society of Chemistry journal article supplement (doi:10.1039/c3cp50631b), 2013-01-01
Supplement: c3cp50631b.pdf [file c3cp50631b.pdf]

**Supporting Information:**

**Tuning the Electronic and Photophysical Properties of Heteroleptic Iridium (III)  
Phosphorescent Emitters through Ancillary Ligand Substitution:  
A Theoretical Perspective**

**Huifang Li, Paul Winget, Chad Risko, John Sears, and Jean-Luc Brédas\***

School of Chemistry and Biochemistry & Center for Organic Photonics and Electronics  
Georgia Institute of Technology  
Atlanta, Georgia 30332-0400

**Table S1.** HOMO and LUMO energies in the ground state of the Flracac and analogs as well as their corresponding triplet energies calculated at the (U)B3LYP/[LANL2DZ-ECP/6-31G(d,p)] level of theory. VE  $\equiv$  vertical  $T_1$  energy; AE  $\equiv$  adiabatic  $T_1$  energy; VIP  $\equiv$  vertical ionization potentials ( $\Delta E$  for the reaction  $A(g) \rightarrow A^+(g) + e^-(g)$  where  $A^+(g)$  is computed using the optimal  $A(g)$  geometry); VEA  $\equiv$  vertical electron affinities ( $\Delta E$  for the reaction  $A(g) \rightarrow A^-(g) + e^-(g)$  where  $A^-(g)$  is computed using the optimal  $A(g)$  geometry).

|                  |          | $S_0$ |       | $\Delta SCF$ |                 |                 |     |       |
|------------------|----------|-------|-------|--------------|-----------------|-----------------|-----|-------|
|                  |          | HOMO  | LUMO  | VE           | AE <sup>a</sup> | AE <sup>b</sup> | VIP | VEA   |
| <b>Flracac</b>   | <b>A</b> | -5.30 | -1.52 | 2.9          | 2.5             | 2.48            | 6.5 | -0.26 |
|                  | <b>B</b> | -5.25 | -1.49 | 2.8          | 2.6             | 2.56            | 6.4 | -0.24 |
|                  | <b>C</b> | -5.34 | -1.48 | 2.9          | 2.7             | 2.62            | 6.5 | -0.23 |
| <b>Flrmfac</b>   | <b>A</b> | -5.58 | -1.67 | 2.6          | 2.2             | 2.15            | 6.8 | -0.46 |
|                  | <b>B</b> | -5.45 | -1.66 | 3.0          | 2.7             | 2.58            | 6.6 | -0.45 |
|                  | <b>C</b> | -5.56 | -1.64 | 2.9          | 2.6             | 2.57            | 6.7 | -0.42 |
|                  | <b>D</b> | -5.57 | -1.65 | 2.9          | 2.4             | 2.33            | 6.9 | -0.43 |
| <b>Flrdbm</b>    | <b>A</b> | -5.30 | -1.72 | 2.4          | 2.1             | 2.05            | 6.4 | -0.57 |
|                  | <b>B</b> | -5.27 | -1.71 | 2.8          | 2.3             | 2.23            | 6.4 | -0.56 |
|                  | <b>C</b> | -5.34 | -1.72 | 2.5          | 2.2             | 2.17            | 6.4 | -0.56 |
| <b>Flrpfac</b>   | <b>A</b> | -5.56 | -1.98 | 2.4          | 2.0             | 1.97            | 6.7 | -0.69 |
|                  | <b>B</b> | -5.44 | -1.94 | 2.8          | 2.2             | 2.22            | 6.6 | -0.68 |
|                  | <b>C</b> | -5.53 | -1.96 | 2.5          | 2.2             | 2.13            | 6.7 | -0.67 |
|                  | <b>D</b> | -5.55 | -1.96 | 2.5          | 2.2             | 2.15            | 6.7 | -0.68 |
| <b>Flrnatfac</b> | <b>A</b> | -5.58 | -2.00 | 2.4          | 2.0             | 1.99            | 6.7 | -0.75 |
|                  | <b>B</b> | -5.45 | -1.99 | 2.6          | 2.2             | 2.19            | 6.6 | -0.76 |
|                  | <b>C</b> | -5.56 | -1.97 | 2.5          | 2.2             | 2.12            | 6.6 | -0.74 |
|                  | <b>D</b> | -5.56 | -2.00 | 2.5          | 2.2             | 2.13            | 6.7 | -0.76 |

<sup>a</sup> Energies without ZPVE correction. <sup>b</sup> Energies with ZPVE correction. The same is true for Table S2 and S3.

**Table S2.** HOMO and LUMO energies in the ground state of the Flrpic and analogs as well as their corresponding triplet energies calculated at the (U)B3LYP/[LANL2DZ-ECP/6-31G(d,p)] level of theory.

|                |          | $S_0$ |       | $\Delta SCF$ |                 |                 |      |       |
|----------------|----------|-------|-------|--------------|-----------------|-----------------|------|-------|
|                |          | HOMO  | LUMO  | VE           | AE <sup>a</sup> | AE <sup>b</sup> | VIP  | VEA   |
| <b>Flrpic</b>  | <b>A</b> | -5.57 | -1.81 | 3.02         | 2.49            | 2.40            | 6.81 | -0.59 |
|                | <b>B</b> | -5.47 | -1.74 | 2.94         | 2.68            | 2.57            | 6.68 | -0.52 |
|                | <b>C</b> | -5.54 | -1.76 | 2.99         | 2.73            | 2.61            | 6.78 | -0.53 |
|                | <b>D</b> | -5.58 | -1.77 | 2.94         | 2.74            | 2.66            | 6.80 | -0.53 |
| <b>Flrmpic</b> | <b>A</b> | -5.53 | 1.78  | 3.04         | 2.53            | 2.45            | 6.76 | -0.56 |
|                | <b>B</b> | -5.50 | -1.70 | 2.94         | 2.69            | 2.58            | 6.71 | -0.52 |
|                | <b>C</b> | -5.48 | -1.71 | 2.95         | 2.79            | 2.67            | 6.70 | -0.51 |
|                | <b>D</b> | -5.60 | -1.72 | 2.94         | 2.66            | 2.53            | 6.81 | -0.51 |
| <b>Flrpic</b>  | <b>A</b> | -5.74 | -2.24 | 2.90         | 2.26            | 2.19            | 6.97 | -0.88 |
|                | <b>B</b> | -5.61 | -2.24 | 2.89         | 2.64            | 2.55            | 6.82 | -0.83 |
|                | <b>C</b> | -5.70 | -2.24 | 2.94         | 2.44            | 2.36            | 6.93 | -0.85 |
|                | <b>D</b> | -5.74 | -2.26 | 2.93         | 2.66            | 2.54            | 6.94 | -0.85 |
| <b>Flrprz</b>  | <b>A</b> | -5.78 | -2.31 | 2.85         | 2.24            | 2.17            | 7.02 | -0.90 |
|                | <b>B</b> | -5.64 | -2.32 | 2.87         | 2.60            | 2.51            | 6.86 | -0.84 |
|                | <b>C</b> | -5.74 | -2.33 | 2.90         | 2.41            | 2.33            | 6.98 | -0.86 |
|                | <b>D</b> | -5.77 | -2.34 | 2.91         | 2.67            | 2.54            | 6.99 | -0.85 |
| <b>Flriq</b>   | <b>A</b> | -5.53 | -2.14 | 2.67         | 2.15            | 2.09            | 6.72 | -0.84 |
|                | <b>B</b> | -5.42 | -2.15 | 2.90         | 2.52            | 2.44            | 6.60 | -0.80 |
|                | <b>C</b> | -5.49 | -2.14 | 2.87         | 2.40            | 2.29            | 6.68 | -0.81 |
|                | <b>D</b> | -5.54 | -2.18 | 2.76         | 2.38            | 2.27            | 6.71 | -0.82 |

**Table S3.** HOMO and LUMO energies in the ground state of the Flrppz and analogs as well as their corresponding triplet energies calculated at the (U)B3LYP/[LANL2DZ-ECP/6-31G(d,p)] level of theory.

|                |          | $S_0$ |       | $\Delta SCF$ |                 |                 |      |       |
|----------------|----------|-------|-------|--------------|-----------------|-----------------|------|-------|
|                |          | HOMO  | LUMO  | VE           | AE <sup>a</sup> | AE <sup>b</sup> | VIP  | VEA   |
| <b>Flrppz</b>  | <b>A</b> | -5.19 | -1.64 | 2.92         | 2.62            | 2.48            | 6.42 | -0.38 |
|                | <b>B</b> | -5.40 | -1.58 | 3.04         | 2.73            | 2.61            | 6.58 | -0.36 |
|                | <b>C</b> | -5.26 | -1.57 | 2.94         | 2.69            | 2.56            | 6.46 | -0.35 |
|                | <b>D</b> | -5.35 | -1.59 | 2.98         | 2.71            | 2.58            | 6.58 | -0.35 |
| <b>Flrmppz</b> | <b>A</b> | -5.05 | -1.63 | 2.81         | 2.53            | 2.39            | 6.28 | -0.37 |
|                | <b>B</b> | -5.29 | -1.56 | 3.05         | 2.73            | 2.61            | 6.48 | -0.35 |
|                | <b>C</b> | -5.14 | -1.55 | 2.86         | 2.60            | 2.48            | 6.34 | -0.34 |
|                | <b>D</b> | -5.18 | -1.57 | 3.03         | 2.60            | 2.48            | 6.43 | -0.34 |
| <b>Flrfppz</b> | <b>A</b> | -5.51 | -1.79 | 3.04         | 2.73            | 2.59            | 6.70 | -0.55 |
|                | <b>B</b> | -5.57 | -1.73 | 3.07         | 2.73            | 2.62            | 6.77 | -0.54 |
|                | <b>C</b> | -5.54 | -1.72 | 3.06         | 2.77            | 2.64            | 6.72 | -0.53 |
|                | <b>D</b> | -5.64 | -1.73 | 3.16         | 2.71            | 2.59            | 6.82 | -0.52 |
| <b>Flrptz</b>  | <b>A</b> | -5.61 | -1.78 | 3.17         | 2.78            | 2.66            | 6.81 | -0.52 |
|                | <b>B</b> | -5.54 | -1.71 | 3.06         | 2.73            | 2.62            | 6.74 | -0.50 |
|                | <b>C</b> | -5.58 | -1.70 | 3.07         | 2.78            | 2.66            | 6.8  | -0.50 |
|                | <b>D</b> | -5.62 | -1.72 | 3.14         | 2.70            | 2.58            | 6.82 | -0.49 |

**Table S4.** Comparison of selected bond lengths for the isolated ancillary proligands and in the Ir complexes in the  $S_0$  state, obtained at the B3LYP/[LANL2DZ-ECP/6-31G(d,p)] level of theory, for the O<sup>^</sup>O, O<sup>^</sup>N and N<sup>^</sup>N series.

|                          | Ancillary Proligands |                    | Ancillary Ligand in Complexes |       |                    |                     |
|--------------------------|----------------------|--------------------|-------------------------------|-------|--------------------|---------------------|
|                          | O3-C <sup>a</sup>    | O3'-C <sup>b</sup> | O3-C                          | O3'-C | Ir-O3 <sup>c</sup> | Ir-O3' <sup>d</sup> |
| <b>O<sup>^</sup>O</b>    |                      |                    |                               |       |                    |                     |
| <b>Flracac</b>           | 1.325                | 1.252              | 1.275                         | 1.275 | 2.192              | 2.192               |
| <b>Flrmfac</b>           | 1.317                | 1.249              | 1.269                         | 1.269 | 2.194              | 2.207               |
| <b>Flrdbm</b>            | 1.324                | 1.262              | 1.278                         | 1.279 | 2.184              | 2.184               |
| <i>exp.</i> <sup>h</sup> |                      |                    |                               |       | 2.121              | 2.149               |
| <b>Flrpfac</b>           | 1.322                | 1.250              | 1.272                         | 1.270 | 2.190              | 2.202               |
| <b>Flrnatfac</b>         | 1.322                | 1.250              | 1.271                         | 1.271 | 2.187              | 2.205               |
| <b>O<sup>^</sup>N</b>    |                      |                    |                               |       |                    |                     |
| <b>Flrpic</b>            | 1.346                | 1.340              | 1.295                         | 1.350 | 2.180              | 2.206               |
| <i>exp.</i> <sup>g</sup> |                      |                    |                               |       | 2.124              | 2.126               |
| <b>Flrmpic</b>           | 1.347                | 1.338              | 1.293                         | 1.355 | 2.158              | 2.298               |
| <b>Flrfpic</b>           | 1.344                | 1.339              | 1.293                         | 1.349 | 2.183              | 2.206               |
| <b>Flrprz</b>            | 1.345                | 1.339              | 1.295                         | 1.347 | 2.186              | 2.199               |
| <b>Flriq</b>             | 1.347                | 1.323              | 1.293                         | 1.336 | 2.160              | 2.204               |
| <b>N<sup>^</sup>N</b>    |                      |                    |                               |       |                    |                     |
| <b>Flrppz</b>            | 1.342                | 1.349              | 1.335                         | 1.367 | 2.141              | 2.235               |
| <b>Flrmpz</b>            | 1.344                | 1.349              | 1.335                         | 1.368 | 2.140              | 2.235               |
| <b>Flrfpz</b>            | 1.336                | 1.348              | 1.330                         | 1.366 | 2.145              | 2.238               |
| <b>Flrptz</b>            | 1.343                | 1.348              | 1.328                         | 1.366 | 2.148              | 2.244               |

<sup>a,b</sup> The bond label in the N<sup>^</sup>N series corresponds to C-N3 or C-N3'. <sup>b</sup> It corresponds to C-N3' in the O<sup>^</sup>N series. <sup>c,d</sup> The bond label in the N<sup>^</sup>N series corresponds to Ir-N3 or Ir-N3'. <sup>d</sup> It corresponds to Ir-N3' in the O<sup>^</sup>N series.

**Table S5.** Variation in selected bond-length parameters for the Ir complexes for the the lowest triplet state compared to the ground state, obtained at the B3LYP/[LANL2DZ-ECP/6-31G(d,p)] level of theory.

|                       | $\Delta d(T_1-S_0)$ |                     |        |        |        |        |
|-----------------------|---------------------|---------------------|--------|--------|--------|--------|
|                       | Ir-X3 <sup>a</sup>  | Ir-X3' <sup>a</sup> | Ir-N1  | Ir-C1  | Ir-N2  | Ir-C2  |
| <b>O^O</b>            |                     |                     |        |        |        |        |
| <b>Flracac</b>        | -0.009              | 0.003               | 0.025  | 0.027  | -0.019 | 0.001  |
| <b>Flrmfac</b>        | 0.001               | -0.016              | 0.025  | 0.027  | -0.017 | 0.003  |
| <b>Flrdbm</b>         | 0.071               | 0.064               | 0.007  | -0.013 | -0.014 | -0.017 |
| <b>Flrpfac</b>        | 0.080               | 0.096               | 0.008  | -0.017 | -0.015 | -0.019 |
| <b>Flrnatfa<br/>c</b> | 0.070               | 0.089               | 0.002  | -0.014 | -0.007 | -0.016 |
| <b>O^N</b>            |                     |                     |        |        |        |        |
| <b>Flrpc</b>          | 0.014               | -0.046              | -0.016 | 0.011  | 0.018  | 0.028  |
| <b>Flrmpic</b>        | 0.006               | -0.050              | -0.016 | 0.006  | 0.022  | 0.032  |
| <b>Flrfpic</b>        | 0.141               | 0.018               | -0.009 | -0.015 | -0.012 | -0.012 |
| <b>Flrprz</b>         | 0.141               | 0.020               | -0.009 | -0.014 | -0.010 | -0.010 |
| <b>Flriq</b>          | 0.128               | 0.010               | -0.005 | -0.015 | -0.017 | -0.014 |
| <b>N^N</b>            |                     |                     |        |        |        |        |
| <b>Flrppz</b>         | -0.009              | -0.029              | -0.015 | 0.008  | 0.026  | 0.027  |
| <b>Flrmppz</b>        | -0.008              | -0.030              | -0.015 | 0.008  | 0.026  | 0.027  |
| <b>Flrfppz</b>        | -0.010              | -0.030              | -0.014 | 0.009  | 0.027  | 0.027  |
| <b>Flrptz</b>         | -0.007              | -0.032              | -0.014 | 0.009  | 0.026  | 0.026  |

<sup>a</sup> X = O or N depending on the ancillary ligand.

**Table S6.** HOMO and LUMO energies in the ground state of the cyclometalating and ancillary proligands used for the heteroleptic Ir complexes discussed here as well as their corresponding vertical IPs and EAs calculated at the B3LYP/[LANL2DZ-ECP/6-31G(d,p)] level of theory.

|               | HOMO  | LUMO  | VIP  | VEA   |
|---------------|-------|-------|------|-------|
| <i>dfppy</i>  | -6.27 | -1.25 | 8.04 | 0.48  |
| <b>O^O</b>    |       |       |      |       |
| <i>acac</i>   | -6.46 | -1.11 | 8.82 | 1.09  |
| <i>mfac</i>   | -7.08 | -2.04 | 9.44 | 0.20  |
| <i>dbm</i>    | -6.75 | -2.47 | 7.80 | -0.46 |
| <i>pfac</i>   | -6.19 | -2.00 | 8.57 | -0.67 |
| <i>natfac</i> | -6.24 | -2.43 | 7.87 | -0.79 |
| <b>O^N</b>    |       |       |      |       |
| <i>pic</i>    | -7.09 | -1.63 | 9.30 | 0.45  |
| <i>mpic</i>   | -6.97 | -1.53 | 9.19 | 0.49  |
| <i>fpic</i>   | -7.49 | -2.10 | 9.64 | -0.09 |
| <i>prz</i>    | -7.06 | -2.14 | 9.30 | -0.01 |
| <i>iq</i>     | -6.42 | -2.08 | 8.28 | -0.28 |
| <b>N^N</b>    |       |       |      |       |
| <i>ppz</i>    | -6.14 | -1.25 | 8.04 | 0.62  |
| <i>mppz</i>   | -6.04 | -1.19 | 7.88 | 0.64  |
| <i>fppz</i>   | -6.59 | -1.58 | 8.43 | 0.25  |
| <i>ptz</i>    | -6.59 | -1.57 | 8.51 | 0.32  |

<sup>a</sup> All energies are in eV. <sup>b</sup> VEAs are defined as the energy change in the process  $M+e^- \rightarrow M^-$ , where negative values indicate exoergicity upon reduction of a molecule.

**Table S7.** HOMO and LUMO energies in the ground state of the heteroleptic Ir complexes as well as their vertical IPs and EAs calculated at the B3LYP/[LANL2DZ-ECP/6-31G(d,p)] level of theory.

|                  | <b>S<sub>0</sub>(Complexes)</b> |             |            |                       |            |            |
|------------------|---------------------------------|-------------|------------|-----------------------|------------|------------|
|                  | <b>HOMO</b>                     | <b>LUMO</b> | <b>VIP</b> | <b>VEA</b>            | <b>AIP</b> | <b>AEA</b> |
|                  |                                 |             |            | <b>O<sup>Δ</sup>O</b> |            |            |
| <b>Flracac</b>   | -5.25                           | -1.49       | 6.4        | -0.24                 | 6.39       | -0.36      |
| <b>Flrmfac</b>   | -5.45                           | -1.66       | 6.6        | -0.45                 | 6.60       | -0.54      |
| <b>Flrdbm</b>    | -5.27                           | -1.71       | 6.4        | -0.56                 | 6.31       | -0.73      |
| <b>Flrpfac</b>   | -5.44                           | -1.94       | 6.6        | -0.68                 | 6.54       | -0.89      |
| <b>Flrnatfac</b> | -5.45                           | -1.99       | 6.6        | -0.76                 | 6.53       | -1.00      |
|                  |                                 |             |            | <b>O<sup>Δ</sup>N</b> |            |            |
| <b>Flrpic</b>    | -5.47                           | -1.74       | 6.6        | -0.52                 | 6.55       | -0.60      |
|                  |                                 |             | 6.6        | -0.68 <sup>a</sup>    |            |            |
| <b>Flrmpic</b>   | -5.50                           | -1.70       | 6.7        | -0.51                 | 6.61       | -0.61      |
| <b>Flrfpic</b>   | -5.61                           | -2.24       | 6.8        | -0.83                 | 6.69       | -1.03      |
| <b>Flrprz</b>    | -5.64                           | -2.32       | 6.8        | -0.84                 | 6.72       | -1.00      |
| <b>Flrig</b>     | -5.42                           | -2.15       | 6.6        | -0.80                 | 6.47       | -0.97      |
|                  |                                 |             |            | <b>N<sup>Δ</sup>N</b> |            |            |
| <b>Flrppz</b>    | -5.40                           | -1.58       | 6.5        | -0.36                 | 6.47       | -0.44      |
| <b>Flrmpz</b>    | -5.29                           | -1.56       | 6.4        | -0.35                 | 6.35       | -0.43      |
| <b>Flrfpz</b>    | -5.57                           | -1.73       | 6.7        | -0.54                 | 6.66       | -0.61      |
| <b>Flrptz</b>    | -5.54                           | -1.71       | 6.7        | -0.50                 | 6.63       | -0.58      |

<sup>a</sup> Values from Ref. 53.



**Table S8.** Contribution to the frontier MOs in the ground state of the heteroleptic Ir complexes, obtained using Mulliken population analysis at B3LYP/[LANL2DZ-ECP/6-31G(d,p)] level of theory.

|                       | HOMO |              |              |           | LUMO |              |              |           |
|-----------------------|------|--------------|--------------|-----------|------|--------------|--------------|-----------|
|                       | Ir   | <i>dfppy</i> | <i>dfppy</i> | ancillary | Ir   | <i>dfppy</i> | <i>dfppy</i> | ancillary |
| <b>O<sup>Λ</sup>O</b> |      |              |              |           |      |              |              |           |
| <b>Flracac</b>        | 0.59 | 0.16         | 0.16         | 0.05      | 0.05 | 0.47         | 0.47         | 0.02      |
| <b>Flrmfac</b>        | 0.46 | 0.16         | 0.17         | 0.04      | 0.04 | 0.29         | 0.48         | 0.22      |
| <b>Flrdbm</b>         | 0.58 | 0.16         | 0.16         | 0.06      | 0.02 | 0.03         | 0.05         | 0.91      |
| <b>Flrpfac</b>        | 0.45 | 0.16         | 0.17         | 0.05      | 0.03 | 0.03         | 0.05         | 0.91      |
| <b>Flrnatfac</b>      | 0.41 | 0.16         | 0.17         | 0.05      | 0.03 | 0.03         | 0.03         | 0.91      |
| <b>O<sup>Λ</sup>N</b> |      |              |              |           |      |              |              |           |
| <b>Flrpic</b>         | 0.46 | 0.16         | 0.18         | 0.06      | 0.02 | 0.18         | 0.05         | 0.75      |
| <b>Flrmpic</b>        | 0.48 | 0.17         | 0.16         | 0.05      | 0.04 | 0.35         | 0.13         | 0.48      |
| <b>Flrfpic</b>        | 0.43 | 0.16         | 0.19         | 0.06      | 0.03 | 0.02         | 0.02         | 0.95      |
| <b>Flrprz</b>         | 0.45 | 0.16         | 0.19         | 0.06      | 0.05 | 0.02         | 0.02         | 0.93      |
| <b>Flriq</b>          | 0.48 | 0.16         | 0.18         | 0.06      | 0.02 | 0.02         | 0.01         | 0.87      |
| <b>N<sup>Λ</sup>N</b> |      |              |              |           |      |              |              |           |
| <b>Flrppz</b>         | 0.49 | 0.12         | 0.21         | 0.09      | 0.05 | 0.87         | 0.04         | 0.06      |
| <b>Flrmppz</b>        | 0.48 | 0.04         | 0.04         | 0.47      | 0.05 | 0.87         | 0.04         | 0.05      |
| <b>Flrfppz</b>        | 0.44 | 0.14         | 0.24         | 0.03      | 0.04 | 0.78         | 0.04         | 0.16      |
| <b>Flrptz</b>         | 0.38 | 0.14         | 0.24         | 0.05      | 0.05 | 0.81         | 0.03         | 0.12      |

**Table S9.** NPA charges changes for the ligands obtained at B3LYP/[LANL2DZ-ECP/6-31G(d,p)] level of theory.

|                  | <b>S<sub>0</sub></b>    |                         | <b>T<sub>1</sub></b> |             |
|------------------|-------------------------|-------------------------|----------------------|-------------|
|                  | <b>q(a)<sup>a</sup></b> | <b>q(d)<sup>b</sup></b> | <b>q(a)</b>          | <b>q(d)</b> |
| <b>O^O</b>       |                         |                         |                      |             |
| <b>Flracac</b>   | -0.424                  | 0.067                   | -0.405               | 0.041       |
| <b>Flrmfac</b>   | -0.459                  | 0.103                   | -0.447               | 0.083       |
| <b>Flrdbm</b>    | -0.437                  | 0.074                   | -0.656               | 0.295       |
| <b>Flrpfac</b>   | -0.463                  | 0.103                   | -0.750               | 0.395       |
| <b>Flrnatfac</b> | -0.465                  | 0.107                   | -0.728               | 0.371       |
| <b>O^N</b>       |                         |                         |                      |             |
| <b>Flrpc</b>     | -0.384                  | 0.086                   | -0.353               | 0.075       |
| <b>Flrmpic</b>   | -0.389                  | 0.087                   | -0.381               | 0.062       |
| <b>Flrfpic</b>   | -0.402                  | 0.104                   | -0.825               | 0.515       |
| <b>Flrprz</b>    | -0.408                  | 0.110                   | -0.827               | 0.516       |
| <b>Flriq</b>     | -0.381                  | 0.080                   | -0.760               | 0.449       |
| <b>N^N</b>       |                         |                         |                      |             |
| <b>Flrppz</b>    | -0.333                  | 0.085                   | -0.327               | 0.069       |
| <b>Flrmpz</b>    | -0.330                  | 0.082                   | -0.324               | 0.065       |
| <b>Flrfppz</b>   | -0.357                  | 0.108                   | -0.352               | 0.094       |
| <b>Flrptz</b>    | -0.356                  | 0.111                   | -0.350               | 0.094       |

<sup>a</sup> q(a) indicates the charge on the ancillary ligand. <sup>b</sup> q(d) indicates the charge on the 2-dfppys.

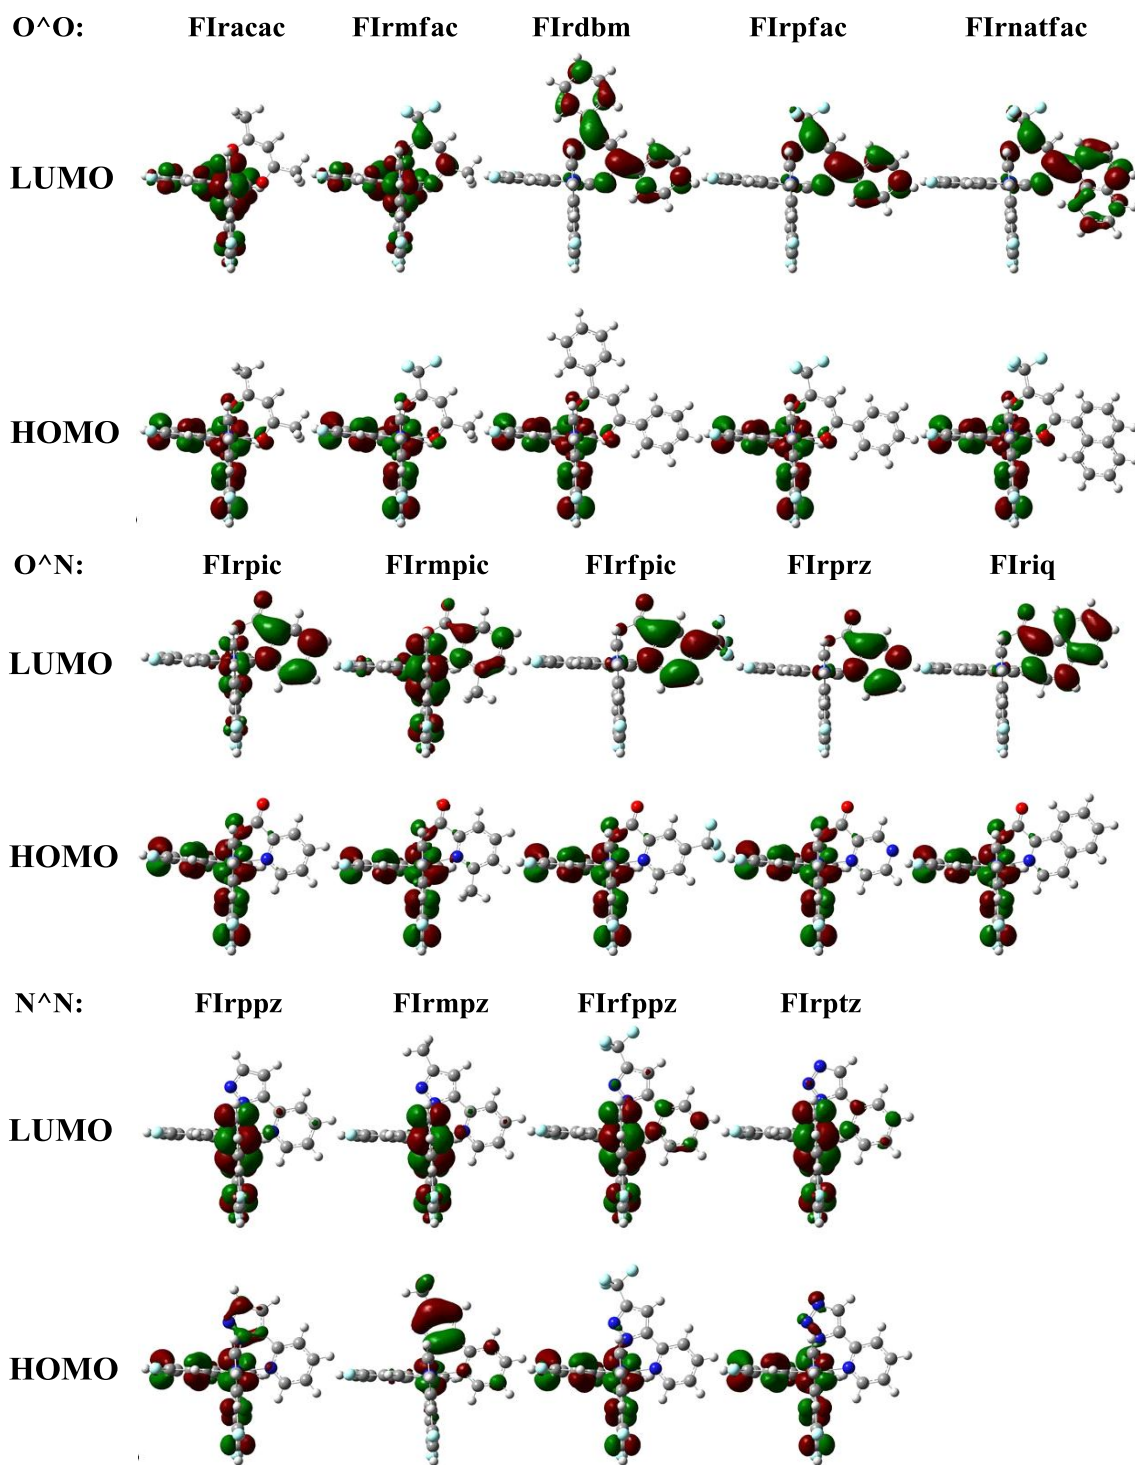

**Figure S1.** Representations of the HOMO and LUMO wave functions as determined at the B3LYP/[LANL2DZ-ECP/6-31G(d,p)] level of theory.

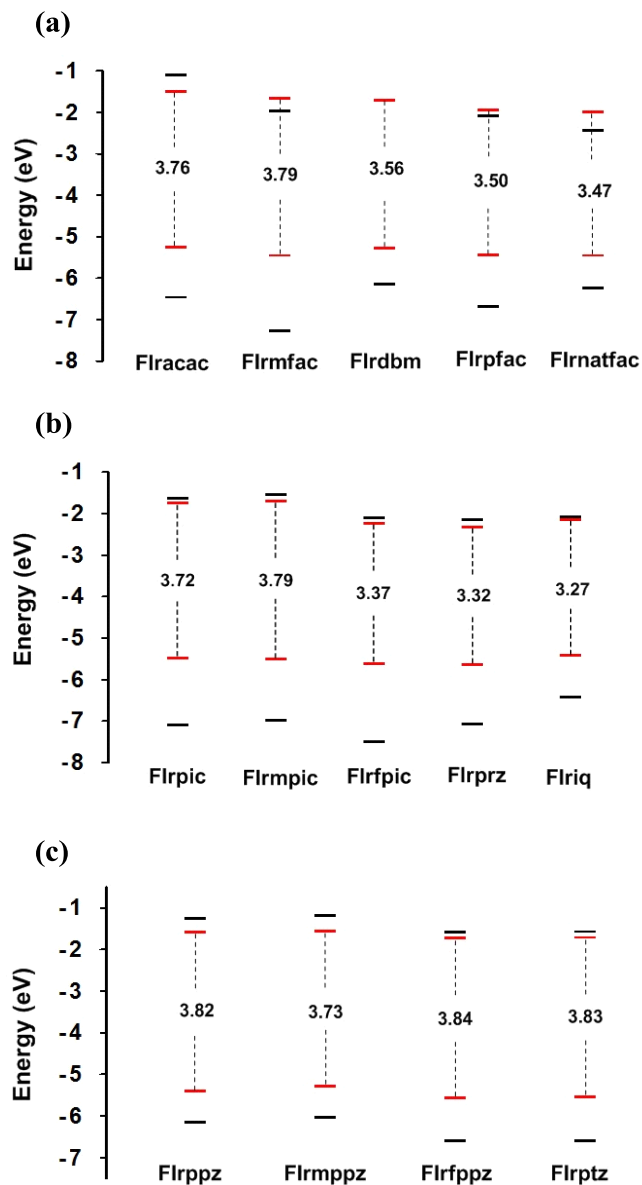

**Figure S2.** Comparison of the energies of the frontier molecular orbitals for the isolated proligands (black lines) and in the corresponding iridium complexes (red lines) in the  $S_0$  state as determined at the B3LYP/[LANL2DZ-ECP/6-31G(d,p)] level of theory.

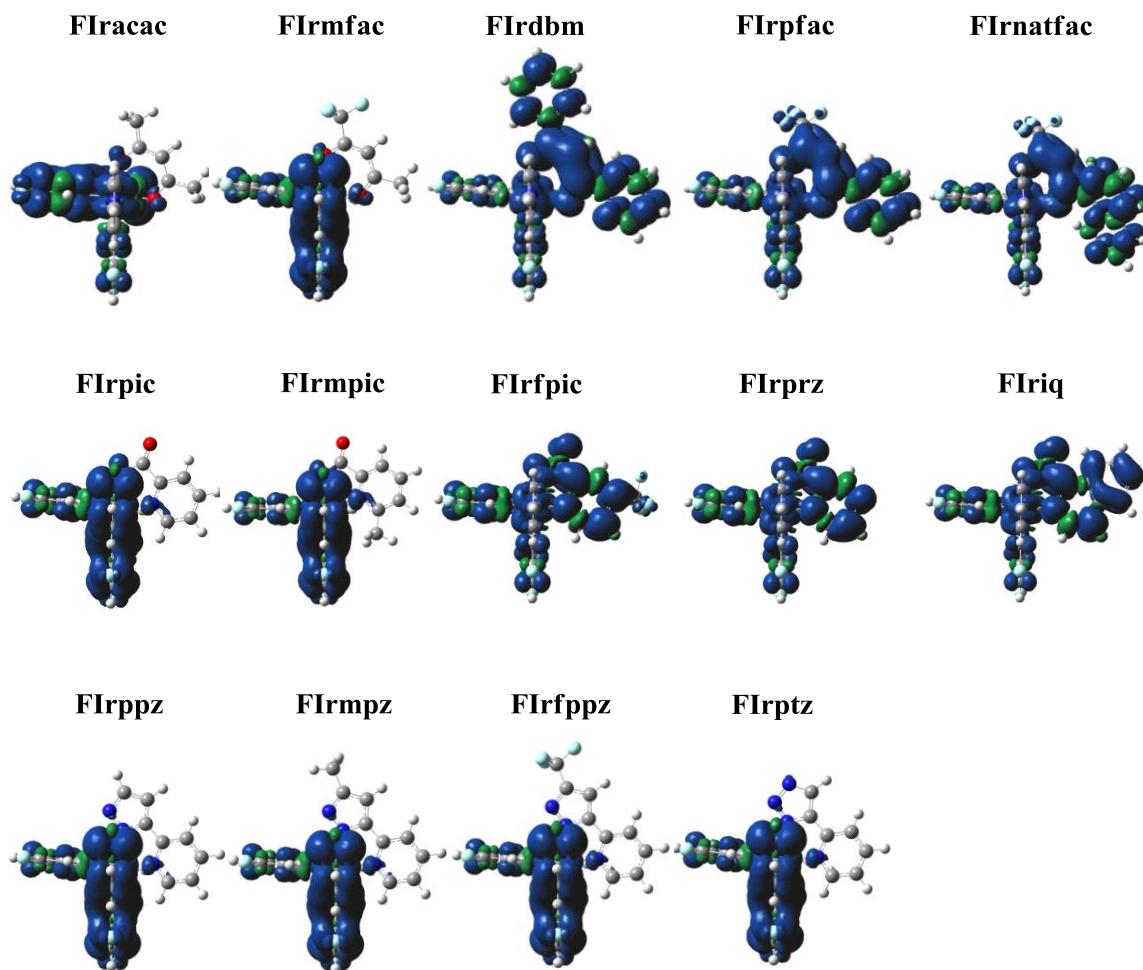

**Figure S3.** Representations of the spin density in the optimized triplet state as determined at the B3LYP/[LANL2DZ-ECP/6-31G(d,p)] level of theory.
